# Supplementary material
Source: PubMed Central journal article supplement (PMC3226049)

Table 01. Experimental parameters and counting results from the optical fractionator<sup>(1)</sup>: Reactive astrocytes, and activated microglia counted markers ( $\Sigma Q^-$ ) of brain regions of interest of albino Swiss mice adult females at 15<sup>a</sup> and 18<sup>a</sup> weeks post Injection of infected (ME7) or normal brain homogenates (NBH)<sup>(1)</sup>

| <i>Regions of interest and subjects</i>   | <i>a(frame) (<math>\mu\text{m}^2</math>)</i> | <i>A(x,y step) (<math>\mu\text{m}^2</math>)</i> | <i>ASF</i> | <i>Average TSF</i> | <i>ssf</i> | <i>Average counting frames</i> | <i>No of sections</i> | <i>Average <math>\Sigma Q^-</math></i> |
|-------------------------------------------|----------------------------------------------|-------------------------------------------------|------------|--------------------|------------|--------------------------------|-----------------------|----------------------------------------|
| <b>ASTROCYTES</b>                         |                                              |                                                 |            |                    |            |                                |                       |                                        |
| <b>Septum</b>                             |                                              |                                                 |            |                    |            |                                |                       |                                        |
| NBH <sup>(2)</sup>                        | 40 x 40                                      | 120 x 120                                       | 0.11       | 0.56 ± 0.06        | 1/5        | 117.25 ± 17.13                 | 3                     | 98.75 ± 48.92                          |
| ME7-15w <sup>(2)</sup>                    | 40 x 40                                      | 120 x 120                                       | 0.11       | 0.58 ± 0.14        | 1/5        | 105 ± 22.3                     | 3                     | 141.75 ± 15.22                         |
| ME7-18w <sup>(2)</sup>                    | 40 x 40                                      | 120 x 120                                       | 0.11       | 0.56 ± 0.05        | 1/5        | 128.5 ± 15.95                  | 3                     | 206.25 ± 13.5                          |
| <b>Polymorphic layer of dentate gyrus</b> |                                              |                                                 |            |                    |            |                                |                       |                                        |
| NBH <sup>(2)</sup>                        | 30 x 30                                      | 60 x 60                                         | 0.25       | 0.34 ± 0.04        | 1/5        | 185.25 ± 1.89                  | 6                     | 178.5 ± 41                             |
| ME7-15w <sup>(2)</sup>                    | 30 x 30                                      | 60 x 60                                         | 0.25       | 0.41 ± 0.17        | 1/5        | 200 ± 22.6                     | 6                     | 260 ± 45.1                             |
| ME7-18w                                   | 30 x 30                                      | 60 x 60                                         | 0.25       | 0.32 ± 0.05        | 1/5        | 231.25 ± 18.39                 | 6                     | 253.75 ± 40.80                         |
| <b>CA1</b>                                |                                              |                                                 |            |                    |            |                                |                       |                                        |
| NBH <sup>(2)</sup>                        | 60 x 60                                      | 120 x 120                                       | 0.25       | 0.57 ± 0.04        | 1/5        | 184.25 ± 8.01                  | 6                     | 346.25 ± 76.8                          |
| ME7-15w <sup>(2)</sup>                    | 60 x 60                                      | 120 x 120                                       | 0.25       | 0.59 ± 0.09        | 1/5        | 184 ± 2.64                     | 6                     | 317.7 ± 46.2                           |
| ME7-18w <sup>(2)</sup>                    | 60 x 60                                      | 120 x 120                                       | 0.25       | 0.61 ± 0.05        | 1/5        | 190 ± 9.1                      | 6                     | 480.7 ± 65.4                           |
| <b>MICROGLIA</b>                          |                                              |                                                 |            |                    |            |                                |                       |                                        |
| <b>Septum</b>                             |                                              |                                                 |            |                    |            |                                |                       |                                        |
| ME7-15w <sup>(2)</sup>                    | 40 x 40                                      | 120 x 120                                       | 0,11       | 0.70 ± 0.13        | 1/5        | 112.75 ± 10.14                 | 3                     | 164.5 ± 41.25                          |
| ME7-18w <sup>(2)</sup>                    | 40 x 40                                      | 120 x 120                                       | 0,11       | 0.69 ± 0.04        | 1/5        | 110.7 ± 7.93                   | 3                     | 356.5 ± 87.1                           |
| <b>Polymorphic Layer of Dentate Gyrus</b> |                                              |                                                 |            |                    |            |                                |                       |                                        |
| ME7-15w <sup>(2)</sup>                    | 40 x 40                                      | 80 x 80                                         | 0,25       | 0.80 ± 0.14        | 1/5        | 146.5 ± 31.07                  | 6                     | 209.75 ± 45.83                         |
| ME7-18w <sup>(2)</sup>                    | 45 x 45                                      | 80 x 80                                         | 0,32       | 0.90 ± 0.03        | 1/5        | 199.5 ± 9.68                   | 6                     | 483.25 ± 122.72                        |
| <b>CA1</b>                                |                                              |                                                 |            |                    |            |                                |                       |                                        |
| ME7-15w <sup>(2)</sup>                    | 60 x 60                                      | 120 x 120                                       | 0,25       | 0.75 ± 0.14        | 1/5        | 182 ± 2.94                     | 6                     | 344.7 ± 106.31                         |
| ME7-18w <sup>(2)</sup>                    | 60 x 60                                      | 120 x 120                                       | 0,25       | 0.84 ± 0.08        | 1/5        | 195 ± 17.28                    | 6                     | 419.25 ± 51.3                          |

<sup>(1)</sup>Area of the optical dissector counting frame, a(frame); x and y step sizes, A(x,y step); asf, area sampling fraction [a(frame)/A(x,y step)]; tsf, thickness sampling fraction, calculated by the height of optical dissector divided by section thickness, h/section thickness. ssf, section sampling fraction.

<sup>(2)</sup> All evaluations were performed with a 60X objective lens (N.A. 1.4; D.F. 0.75 $\mu\text{m}$ )

Table. 02. Experimental parameters and counting results from the optical fractionator<sup>(1)</sup>: perineuronal nets and neurons counted markers ( $\Sigma Q^-$ ) of brain regions of interest of adult females of albino Swiss mice at 15<sup>a</sup> (G2) or 18<sup>a</sup> (G3) weeks post injection of infected (ME7) or normal brain homogenates (NBH)<sup>(1)</sup>

| <b>Regions of Interest and subjects</b>   | <b>a(frame) (<math>\mu\text{m}^2</math>)</b> | <b>A(x,y step) (<math>\mu\text{m}^2</math>)</b> | <b>asf</b> | <b>Average TSF</b> | <b>SSF</b> | <b>Average Counting frames</b> | <b>No of Sections</b> | <b><math>\Sigma Q^-</math></b> |
|-------------------------------------------|----------------------------------------------|-------------------------------------------------|------------|--------------------|------------|--------------------------------|-----------------------|--------------------------------|
| <b>PERINEURONAL NETS</b>                  |                                              |                                                 |            |                    |            |                                |                       |                                |
| <b>Septum</b>                             |                                              |                                                 |            |                    |            |                                |                       |                                |
| ME7-15w <sup>(2)</sup>                    | 70 x 70                                      | 120 x 120                                       | 0,34       | 0.89 ± 0.04        | 1/5        | 123.25 ± 12.04                 | 3                     | 172.5 ± 43.12                  |
| ME7-18w <sup>(2)</sup>                    | 70 x 70                                      | 120 x 120                                       | 0,34       | 0.91 ± 0.02        | 1/5        | 128.3 ± 24.6                   | 3                     | 134.5 ± 55.5                   |
| NBH <sup>(2)</sup>                        | 70 x 70                                      | 120 x 120                                       | 0,34       | 0.87 ± 0.02        | 1/5        | 165.7 ± 16.88                  | 3                     | 308.7 ± 51.2                   |
| <b>CA1</b>                                |                                              |                                                 |            |                    |            |                                |                       |                                |
| ME7-15w <sup>(2)</sup>                    | 120 x 120                                    | 120 x 120                                       | 1.00       | 0.88 ± 0.02        | 1/5        | 171.5 ± 7.42                   | 6                     | 314.5 ± 21.9                   |
| ME7-18w <sup>(2)</sup>                    | 120 x 120                                    | 120 x 120                                       | 1.00       | 0.88 ± 0.02        | 1/5        | 170.7 ± 6.55                   | 6                     | 239 ± 66.23                    |
| NBH <sup>(2)</sup>                        | 120 x 120                                    | 120 x 120                                       | 1.00       | 0.94 ± 0.02        | 1/5        | 237.5 ± 39.34                  | 6                     | 473.75 ± 53.57                 |
| <b>NEURONS</b>                            |                                              |                                                 |            |                    |            |                                |                       |                                |
| <b>Polymorphic Layer of Dentate Gyrus</b> |                                              |                                                 |            |                    |            |                                |                       |                                |
| NBH <sup>(2)</sup>                        | 40 x 40                                      | 50 x 50                                         | 0.64       | 0.36 ± 0.029       | 1/5        | 286 ± 18.1                     | 6                     | 974.7 ± 71.91                  |
| ME7-18w <sup>(2)</sup>                    | 40 x 40                                      | 50 x 50                                         | 0.64       | 0.35 ± 0.060       | 1/5        | 327 ± 16.0                     | 6                     | 1096 ± 118.0                   |
| <b>Septum</b>                             |                                              |                                                 |            |                    |            |                                |                       |                                |
| NBH <sup>(2)</sup>                        | 30 x 30                                      | 100 x 100                                       | 0,09       | 0.39 ± 0.040       | 1/5        | 206.2 ± 18.16                  | 3                     | 609.5 ± 13.0                   |
| ME7-18w                                   | 30 x 30                                      | 100 x 100                                       | 0,09       | 0.42 ± 0.005       | 1/5        | 203.25 ± 12.36                 | 3                     | 673.5 ± 55.6                   |

<sup>(1)</sup>Area of the optical dissector counting frame, a(frame); x and y step sizes, A(x,y step); asf, area sampling fraction [a(frame)/A(x,y step)]; tsf, thickness sampling fraction, calculated by the height of optical dissector divided by section thickness, h/section thickness. ssf, section sampling fraction.

<sup>(2)</sup> All evaluations were performed with a 60X objective lens (N.A. 1.4; D.F. 0,75 $\mu\text{m}$ )

Table 3. Estimated individual unilateral activated microglial numbers (n) with coefficient of error (CE) of Septum, CA1 and polymorphic layer of dentate gyrus of albino Swiss mice adult females after 15 or 18 weeks post-inoculation of ME7 infected (ME7) or normal brain homogenates (NBH): mean group numbers (Mean, N), standard deviation (S.D.) and individual and mean CEs.

|                                           |              |        |      |                                          |              |        |       |                                          |              |        |      |
|-------------------------------------------|--------------|--------|------|------------------------------------------|--------------|--------|-------|------------------------------------------|--------------|--------|------|
| ME7-3/18w                                 | 14.89 ± 0.49 | 11228  | 0.05 | ME7-1/18w                                | 14.62 ± 0.35 | 9794   | 0.05  | ME7-3/18w                                | 19.14 ± 0.91 | 24512  | 0.07 |
| ME7-6/18w                                 | 15.33 ± 0.66 | 9130   | 0.06 | ME7-7/18w                                | 17.15 ± 0.83 | 10270  | 0.06  | ME7-6/18w                                | 19.54 ± 0.75 | 29596  | 0.07 |
| ME7-9/18w                                 | 14.2 ± 0.38  | 8474   | 0.05 | ME7-9/18w                                | 16.88 ± 0.42 | 12443  | 0.05  | ME7-9/18w                                | 22.0 ± 2.51  | 16797  | 0.07 |
| ME7-10/18w                                | 14.13 ± 0.27 | 5639   | 0.07 | ME7-10/18w                               | 20.34 ± 0.35 | 11752  | 0.06  | ME7-10/18w                               | 17.84 ± 0.35 | 22715  | 0.07 |
| Mean ME7/18w                              | 14.64 ± 0.29 | 8618   | 0.06 | Mean                                     | 17.25 ± 1.18 | 11065  | 0.055 | Mean                                     | 19.63 ± 0.87 | 23405  | 0.07 |
| S.D.                                      |              | ± 2307 |      | S.D.                                     |              | ± 1241 |       | S.D.                                     |              | ± 5282 |      |
| CV <sup>2</sup> =(S.D./Mean) <sup>2</sup> |              | 0.073  |      | CV <sup>2</sup> =                        |              | 0.0125 |       | CV <sup>2</sup> =                        |              | 0.050  |      |
| CE <sup>2</sup>                           |              | 0.004  |      | CE <sup>2</sup>                          |              | 0.0030 |       | CE <sup>2</sup>                          |              | 0.005  |      |
| CE <sup>2</sup> /CV <sup>2</sup>          |              | 0.055  |      | CE <sup>2</sup> /CV <sup>2</sup>         |              | 0.242  |       | CE <sup>2</sup> /CV <sup>2</sup>         |              | 0.10   |      |
| CVB <sup>2</sup>                          |              | 0.069  |      | CVB <sup>2</sup>                         |              | 0.0095 |       | CVB <sup>2</sup>                         |              | 0.045  |      |
| CVB <sup>2</sup> (% of CV <sup>2</sup> )  |              | 94.52% |      | CVB <sup>2</sup>                         |              | 76%    |       | CVB <sup>2</sup>                         |              | 90%    |      |
| CE <sup>2</sup> /CV <sup>2</sup>          |              | 0.436  |      | CE <sup>2</sup> /CV <sup>2</sup>         |              | 0.0213 |       | CE <sup>2</sup> /CV <sup>2</sup>         |              | 0.05   |      |
| CVB <sup>2</sup>                          |              | 0.021  |      | CVB <sup>2</sup>                         |              | 0.0181 |       | CVB <sup>2</sup>                         |              | 0.121  |      |
| CVB <sup>2</sup> (% of CV <sup>2</sup> )  |              | 56.76% |      | CVB <sup>2</sup> (% of CV <sup>2</sup> ) |              | 78.7%  |       | CVB <sup>2</sup> (% of CV <sup>2</sup> ) |              | 95.3%  |      |
| ME7-1/15w                                 | 14.01 ± 0.13 | 5599   | 0.07 | ME7-1/15w                                | 15.91 ± 0.73 | 5599   | 0.05  | ME7-1/15w                                | 15.2 ± 0.30  | 10454  | 0.08 |
| ME7-4/15w                                 | 21.7 ± 2.50  | 5055   | 0.10 | ME7-4/15w                                | 24.6 ± 2.20  | 9888   | 0.05  | ME7-4/15w                                | 25.2 ± 1.88  | 9869   | 0.09 |
| ME7-2/15w                                 | 18.7 ± 0.80  | 6450   | 0.08 | ME7-2/15w                                | 21.42 ± 0.68 | 8325   | 0.05  | ME7-2/15w                                | 19.54 ± 3.17 | 9416   | 0.08 |
| ME7-9/15w                                 | 13.89 ± 0.27 | 4393   | 0.08 | ME7-9/15w                                | 14.35 ± 0.16 | 10699  | 0.05  | ME7-9/15w                                | 19.0 ± 1.52  | 12274  | 0.07 |
| Mean ME7/15w                              | 17.1 ± 1.90  | 5374   | 0.08 | Mean                                     | 19.07 ± 2.39 | 8628   | 0.05  | Mean                                     | 19.7 ± 2.06  | 10503  | 0.08 |
| S.D.                                      |              | ± 870  |      | S.D.                                     |              | 2247   |       | S.D.                                     |              | ± 1255 |      |
| CV <sup>2</sup> =(S.D./Mean) <sup>2</sup> |              | 0.026  |      | CV <sup>2</sup>                          |              | 0.0676 |       | CV <sup>2</sup>                          |              | 0.0144 |      |
| CE <sup>2</sup>                           |              | 0.0064 |      | CE <sup>2</sup>                          |              | 0.0025 |       | CE <sup>2</sup>                          |              | 0.0064 |      |
| CE <sup>2</sup> /CV <sup>2</sup>          |              | 0.25   |      | CE <sup>2</sup> /CV <sup>2</sup>         |              | 0.037  |       | CE <sup>2</sup> /CV <sup>2</sup>         |              | 0.44   |      |
| CVB <sup>2</sup>                          |              | 0.0196 |      | CVB <sup>2</sup>                         |              | 0.0651 |       | CVB <sup>2</sup>                         |              | 0.0080 |      |
| CVB <sup>2</sup> (% of CV <sup>2</sup> )  |              | 75.4%  |      | CVB <sup>2</sup>                         |              | 96.3%  |       | CVB <sup>2</sup>                         |              | 55.5%  |      |

CVB<sup>2</sup> = CV<sup>2</sup> - CE<sup>2</sup>  
(CE, coefficient of error; CV coefficient of variation; CVB, biological coefficient of variation).

Table 4. Estimated individual unilateral reactive astrocyte numbers (n) with coefficient of error (CE) of polymorphic layer of dentate gyrus, CA1 and Septum of albino Swiss mice adult females after 15 or 18 weeks post-inoculation of ME7 infected (ME7) or normal brain homogenates (NBH): mean group numbers (Mean, N), standard deviation (S.D.) and individual and mean CEs.

| <b>Astrocytes</b>                          |                          |          |           |                                  |                          |          |           |                                  |                          |          |           |
|--------------------------------------------|--------------------------|----------|-----------|----------------------------------|--------------------------|----------|-----------|----------------------------------|--------------------------|----------|-----------|
| <b>Polymorphic layer of Dentate Gyrus</b>  |                          |          |           | <b>CA1</b>                       |                          |          |           | <b>Septum</b>                    |                          |          |           |
| <b>Subjects</b>                            | <b>Section Thickness</b> | <b>N</b> | <b>CE</b> | <b>Subjects</b>                  | <b>Section Thickness</b> | <b>N</b> | <b>CE</b> | <b>Subjects</b>                  | <b>Section Thickness</b> | <b>N</b> | <b>CE</b> |
| NBH4                                       | 22.05 ± 0.38             | 12672    | 0.06      | NBH-5                            | 24.5 ± 0.22              | 12120    | 0.06      | NBH-4                            | 22.2 ± 0.95              | 8291     | 0.097     |
| NBH5                                       | 22.44 ± 1.32             | 8147     | 0.06      | NBH-6                            | 23.4 ± 1.2               | 12092    | 0.05      | NBH-5                            | 26.44 ± 3.82             | 9552     | 0.11      |
| NBH-6                                      | 27.2 ± 4.10              | 9946     | 0.06      | NBH-8                            | 23.9 ± 3.7               | 10458    | 0.06      | NBH-6                            | 26.6 ± 1.2               | 8833     | 0.11      |
| NBH-9                                      | 23.8 ± 0.30              | 9041     | 0.06      | NBH-9                            | 21.5 ± 0.9               | 15229    | 0.05      | NBH-8                            | 21.6 ± 1.14              | 7157     | 0.13      |
| NBH Mean                                   | 23.87 ± 1.17             | 9951     | 0.06      | NBH Mean                         |                          | 12475    | 0.055     | NBH Mean                         | 24.21 ± 1.34             | 8458     | 0.11      |
| S.D.                                       |                          | 1956     |           | S.D.                             |                          | ± 1994   |           | S.D.                             |                          | ± 1010   |           |
| CV <sup>2</sup> = (S.D./Mean) <sup>2</sup> |                          | 0.038    |           | CV <sup>2</sup>                  |                          | 0.0255   |           | CV <sup>2</sup> =                |                          | 0.0142   |           |
| CE <sup>2</sup>                            |                          | 0.0036   |           | CE <sup>2</sup>                  |                          | 0.003    |           | CE <sup>2</sup>                  |                          | 0.0121   |           |
| CE <sup>2</sup> /CV <sup>2</sup>           |                          | 0.095    |           | CE <sup>2</sup> /CV <sup>2</sup> |                          | 0.119    |           | CE <sup>2</sup> /CV <sup>2</sup> |                          | 0.85     |           |
| CVB <sup>2</sup>                           |                          | 0.0344   |           | CVB <sup>2</sup>                 |                          | 0.0225   |           | CVB <sup>2</sup>                 |                          | 0.0021   |           |
| CVB <sup>2</sup> (% of CV <sup>2</sup> )   |                          | 90.5%    |           | CVB <sup>2</sup>                 |                          | 88.2%    |           | CVB <sup>2</sup>                 |                          | 14.8%    |           |
| ME7-4/15w <sup>(2)</sup>                   | 25.9 ± 1.81              | 15778    | 0.07      | ME7-2/15w                        | 25.66 ± 0.79             | 12399    | 0.058     | ME7-3/15w                        | 25.54 ± 0.85             | 10569    | 0.12      |
| ME7-2/15w <sup>(2)</sup>                   | 23.95 ± 1.04             | 15345    | 0.05      | ME7-4/15w                        | 27.19 ± 0.87             | 13921    | 0.054     | ME7-115w                         | 24.15 ± 2.17             | 12681    | 0.10      |
| ME7-8/15w <sup>(2)</sup>                   | 25.40 ± 1.41             | 14936    | 0.05      | ME7-8/15w                        | 21.03 ± 0.27             | 8617     | 0.052     | ME7-215w                         | 27.93 ± 1.55             | 13768    | 0.10      |
| ME7-9/15w <sup>(2)</sup>                   | 12.54 ± 0.55             | 10260    | 0.06      | ME7-9/15w                        | 19.79 ± 0.57             | 10699    | 0.059     | ME7-915w                         | 16.61 ± 0.46             | 8669     | 0.12      |
| ME7/15w Mean                               | 21.95 ± 3.16             | 14080    | 0.057     | ME7/15w Mean                     | 19.07 ± 2.39             | 11409    | 0.056     | ME7/15w Mean                     |                          | 11422    | 0.11      |
| S.D.                                       |                          | ± 2570   |           | S.D.                             |                          | 2280     |           | S.D.                             |                          | 2265     |           |
| CV <sup>2</sup> = (S.D./Mean) <sup>2</sup> |                          | 0.0324   |           | CV <sup>2</sup>                  |                          | 0.0399   |           | CV <sup>2</sup>                  |                          | 0.04     |           |
| CE <sup>2</sup>                            |                          | 0.0032   |           | CE <sup>2</sup>                  |                          | 0.0031   |           | CE <sup>2</sup>                  |                          | 0.01     |           |
| CE <sup>2</sup> /CV <sup>2</sup>           |                          | 0.099    |           | CE <sup>2</sup> /CV <sup>2</sup> |                          | 0.079    |           | CE <sup>2</sup> /CV <sup>2</sup> |                          | 0.25     |           |
| CVB <sup>2</sup>                           |                          | 0.0292   |           | CVB <sup>2</sup>                 |                          | 0.0368   |           | CVB <sup>2</sup>                 |                          | 0.03     |           |
| CVB <sup>2</sup> (% of CV <sup>2</sup> )   |                          | 90.12%   |           | CVB <sup>2</sup>                 |                          | 92.23%   |           | CVB <sup>2</sup>                 |                          | 75%      |           |
| ME7-1/18w <sup>(2)</sup>                   | 20.0 ± 0.35              | 13046    | 0.05      | ME7-1/18w                        | 19.33 ± 1.17             | 13756    | 0.043     | ME7-1/18w                        | 25.5 ± 0.8               | 15227    | 0.06      |
| ME7-5/18w <sup>(2)</sup>                   | 24.73 ± 0.22             | 19046    | 0.05      | ME7-5/18w                        | 22.54 ± 0.24             | 19752    | 0.040     | ME7-5/18w                        | 23.1 ± 1.2               | 18036    | 0.05      |
| ME7-6/18w <sup>(2)</sup>                   | 29.7 ± 2.31              | 15470    | 0.05      | ME7-6/18w                        | 22.09 ± 0.53             | 14119    | 0.042     | ME7-6/18w                        | 26.26 ± 1.81             | 17038    | 0.05      |
| ME7-7/18w <sup>(2)</sup>                   | 25.8 ± 0.33              | 14975    | 0.05      | ME7-7/18w                        | 22.90 ± 0.66             | 16943    | 0.040     | ME7-7/18w                        | 25.05 ± 0.14             | 17819    | 0.07      |
| ME7/18w Mean                               | 14.64 ± 0.29             | 15634    | 0.05      | Mean                             | 21.51 ± 0.73             | 16142    | 0.041     | Mean                             | 23.96 ± 1.07             | 17030    | 0.0675    |
| S.D.                                       |                          | ± 2503   |           | S.D.                             |                          | ± 2796   |           | S.D.                             |                          | ± 1276   |           |
| CV <sup>2</sup> = (S.D./Mean) <sup>2</sup> |                          | 0.026    |           | CV <sup>2</sup> =                |                          | 0.0289   |           | CV <sup>2</sup> =                |                          | 0.0056   |           |
| CE <sup>2</sup>                            |                          | 0.0025   |           | CE <sup>2</sup>                  |                          | 0.0017   |           | CE <sup>2</sup>                  |                          | 0.0045   |           |
| CE <sup>2</sup> /CV <sup>2</sup>           |                          | 0.096    |           | CE <sup>2</sup> /CV <sup>2</sup> |                          | 0.0582   |           | CE <sup>2</sup> /CV <sup>2</sup> |                          | 0.8      |           |
| CVB <sup>2</sup>                           |                          | 0.0235   |           | CVB <sup>2</sup>                 |                          | 0.0272   |           | CVB <sup>2</sup>                 |                          | 0.0011   |           |
| CVB <sup>2</sup> (% of CV <sup>2</sup> )   |                          | 90.38%   |           | CVB <sup>2</sup>                 |                          | 94.11%   |           | CVB <sup>2</sup>                 |                          | 19.7%    |           |

$CVB^2 = CV^2 - CE^2$  (CE, coefficient of error; CV coefficient of variation; CVB, biological coefficient of variation).

Table 05. Estimated Individual Unilateral Perineuronal Nets Numbers (N) with Coefficient of Error (CE) of the Septal Region and CA1 of Albino Swiss Mice Adult Females after 15 or 18 Weeks Post-Inoculation: Mean Group Numbers (Mean, N), Standard Deviation (SD) and Individual and Mean CEs.

| <i>Subjects</i>                            | <i>Section Thickness</i> | <i>N</i> | <i>CE</i> | <i>Subjects</i>                                         | <i>Section Thickness</i> | <i>N</i> | <i>CE</i> |
|--------------------------------------------|--------------------------|----------|-----------|---------------------------------------------------------|--------------------------|----------|-----------|
| <b>Septum</b>                              |                          |          |           | <b>CA1</b>                                              |                          |          |           |
| NBH-1                                      | 23.2 ± 0.08              | 5931     | 0.08      | NBH-1                                                   | 22.01 ± 1.6              | 2908     | 0.05      |
| NBH-2                                      | 22.7 ± 0.27              | 5939     | 0.06      | NBH-2                                                   | 22.15 ± 1.1              | 2336     | 0.07      |
| NBH-5                                      | 23.6 ± 0.27              | 4852     | 0.08      | NBH-3                                                   | 22.12 ± 0.49             | 2579     | 0.05      |
| NBH-3                                      | 22.5 ± 0.07              | 4255     | 0.07      | NBH-6                                                   | 22.09 ± 0.63             | 2906     | 0.05      |
| Mean                                       |                          | 5244     | 0.07      |                                                         |                          | 2682     | 0.055     |
| S.D.                                       |                          | ± 834    |           |                                                         |                          | ± 277    |           |
| CV <sup>2</sup> =(S.D. <sub>2</sub> /Mean) |                          | 0.026    |           |                                                         |                          | 0.011    |           |
| CE <sup>2</sup>                            |                          | 0.005    |           |                                                         |                          | 0.003    |           |
| CE <sup>2</sup> /CV <sup>2</sup>           |                          | 0.2      |           |                                                         |                          | 0.275    |           |
| CVB <sup>2</sup>                           |                          | 0.021    |           |                                                         |                          | 0.008    |           |
| CVB <sup>2</sup> (% of CV <sup>2</sup> )   |                          | 80.77%   |           |                                                         |                          | 72.7%    |           |
| ME7-6/15w                                  | 21.5 ± 0.06              | 2055     | 0.07      | ME7-1/15w                                               | 22.39 ± 0.09             | 1773     | 0.07      |
| ME7-8/15w                                  | 22.3 ± 0.26              | 2386     | 0.12      | ME7-6/15w                                               | 22.63 ± 0.12             | 1621     | 0.078     |
| ME7-10/15w                                 | 22.62 ± 0.27             | 3794     | 0.09      | ME78/15w                                                | 23.36 ± 0.65             | 1938     | 0.059     |
| ME7-11/15w                                 | 24.09 ± 0.98             | 3303     | 0.09      | ME710/15w                                               | 22.26 ± 0.15             | 1769     | 0.07      |
| Mean                                       | 22.18 ± 0.24             | 2884     | 0.09      | Mean                                                    |                          | 1775     | 0.069     |
| S.D.                                       |                          | ± 804    |           | S.D.                                                    |                          | ± 129    |           |
| CV <sup>2</sup> =(S.D. <sub>2</sub> /Mean) |                          | 0.08     |           | CV <sup>2</sup> =(S.D. <sub>2</sub> /Mean) <sup>2</sup> |                          | 0.0053   |           |
| CE <sup>2</sup>                            |                          | 0.008    |           | CE <sup>2</sup>                                         |                          | 0.0048   |           |
| CE <sup>2</sup> /CV <sup>2</sup>           |                          | 0.1      |           | CE <sup>2</sup> /CV <sup>2</sup>                        |                          | 0.9      |           |
| CVB <sup>2</sup>                           |                          | 0.072    |           | CVB <sup>2</sup>                                        |                          | 0.0005   |           |
| CVB <sup>2</sup> (% of CV <sup>2</sup> )   |                          | 90%      |           | CVB <sup>2</sup> (% of CV <sup>2</sup> )                |                          | 9.43%    |           |
| ME7-4/18w <sup>(2)</sup>                   | 21.94 ± 0.09             | 1643     | 0.12      | ME7-4/18w                                               | 22.6 ± 0.1               | 1299     | 0.08      |
| ME7-7/18w <sup>(2)</sup>                   | 22.48 ± 0.58             | 1357     | 0.16      | ME7-5/18w                                               | 22.54 ± 0.1              | 1890     | 0.07      |
| ME7-5/18w <sup>(2)</sup>                   | 22.19 ± 0.85             | 2403     | 0.10      | ME7-6/18w                                               | 23.59 ± 0.29             | 1167     | 0.08      |
| ME7-6/18w <sup>(2)</sup>                   | 21.0 ± 0.10              | 4060     | 0.07      | ME7-7/18w                                               | 22.9 ± 0.18              | 1107     | 0.08      |
| Mean                                       | 21.90 ± 0.32             | 2354     | 0.11      |                                                         |                          | 1365     |           |
| S.D.                                       |                          | ± 1190   |           |                                                         |                          | ± 358    | 0.08      |
| CV <sup>2</sup> =(S.D. <sub>2</sub> /Mean) |                          | 0.25     |           |                                                         |                          | 0.0676   |           |
| CE <sup>2</sup>                            |                          | 0.01     |           |                                                         |                          | 0.0064   |           |
| CE <sup>2</sup> /CV <sup>2</sup>           |                          | 0.04     |           |                                                         |                          | 0.095    |           |
| CVB <sup>2</sup>                           |                          | 0.24     |           |                                                         |                          | 0.0612   |           |
| CVB <sup>2</sup> (% of CV <sup>2</sup> )   |                          | 96%      |           |                                                         |                          | 90.5%    |           |

CVB<sup>2</sup> = CV<sup>2</sup> – CE<sup>2</sup> (CE, coefficient of error; CV coefficient of variation; CVB, biological coefficient of variation).

Table 06. Estimated individual unilateral neuronal numbers (n) with coefficient of error (CE) of polymorphic layer of dentate gyrus, and Septum of albino Swiss mice adult females after 18 weeks post-inoculation of ME7 infected (ME7) or normal brain homogenates (NBH): mean group numbers (Mean, N), standard deviation (S.D.) and individual and mean CEs.

| <b>Neurons</b>                            |                          |          |           |                 |                          |          |           |
|-------------------------------------------|--------------------------|----------|-----------|-----------------|--------------------------|----------|-----------|
| <b>Polymorphic layer of Dentate Gyrus</b> |                          |          |           | <b>Septum</b>   |                          |          |           |
| <b>Subjects</b>                           | <b>Section Thickness</b> | <b>N</b> | <b>CE</b> | <b>Subjects</b> | <b>Section Thickness</b> | <b>N</b> | <b>CE</b> |
| NBH-3                                     | 28.29 ± 0.29             | 24469    | 0.052     | NBH-4           | 20.88± 0.22              | 84890    | 0.044     |
| NBH-8                                     | 22.00 ± 0.31             | 20700    | 0.040     | NBH-3           | 19.64 ± 0.12             | 82795    | 0.05      |
| NBH-4                                     | 19.67 ± 0.73             | 18580    | 0.044     | NBH-10          | 28.37 ± 1.33             | 120001   | 0.046     |
| NBH-5                                     | 22.43 ± 0.48             | 25432    | 0.040     | NBH-5           | 16.37 ± 0.28             | 72891    | 0.045     |
| Mean                                      |                          | 22295    | 0.044     | Mean            |                          | 90144    | 0.046     |
| S.D.                                      |                          | ± 3210   |           | S.D.            |                          | 20581    |           |
| $CV^2=(S.D./Mean)^2$                      |                          | 0.021    |           | $CV^2$          |                          | 0.0529   |           |
| $CE^2$                                    |                          | 0.0020   |           | $CE^2$          |                          | 0.0021   |           |
| $CE^2/CV^2$                               |                          | 0.09     |           | $CE^2/CV^2$     |                          | 0.04     |           |
| $CVB^2$                                   |                          | 0.02     |           | $CVB^2$         |                          | 0.0021   |           |
| $CVB^2$ (% of $CV^2$ )                    |                          | 90.48%   |           | $CVB^2$         |                          | 96.03%   |           |
| ME7-8G3                                   | 23.71 ± 0.39             | 23101    | 0.042     | ME7-4/18w       | 19.27 ± 0.4              | 68217    | 0.049     |
| ME7-10G3                                  | 26.51 ± 1.38             | 35977    | 0.047     | ME7-8/18w       | 18.7 ± 0.1               | 88214    | 0.049     |
| ME7-4G3                                   | 21.43 ± 0.39             | 17493    | 0.043     | ME7-6/18w       | 19.57 ± 0.14             | 103285   | 0.041     |
| ME7-6G3                                   | 22.24 ± 1.32             | 22911    | 0.044     | ME7-10/18w      | 19.5 ± 0.79              | 98418    | 0.043     |
| Mean                                      | 23.47 ± 1.12             | 24870    | 0.044     | Mean            | 19.26 ± 0.20             | 89533    | 0.0455    |
| S.D.                                      |                          | ± 7848   |           | S.D.            |                          | ± 15337  |           |
| $CV^2=(S.D./Mean)^2$                      |                          | 0.0961   |           | $CV^2$          |                          | 0.0289   |           |
| $CE^2$                                    |                          | 0.002    |           | $CE^2$          |                          | 0.0020   |           |
| $CE^2/CV^2$                               |                          | 0.021    |           | $CE^2/CV^2$     |                          | 0.0716   |           |
| $CVB^2$                                   |                          | 0.0941   |           | $CVB^2$         |                          | 0.0269   |           |
| $CVB^2$ (% of $CV^2$ )                    |                          | 98.0%    |           | $CVB^2$         |                          | 93.1%    |           |

$CVB^2 = CV^2 - CE^2$  (CE, coefficient of error; CV coefficient of variation; CVB, biological coefficient of variation).

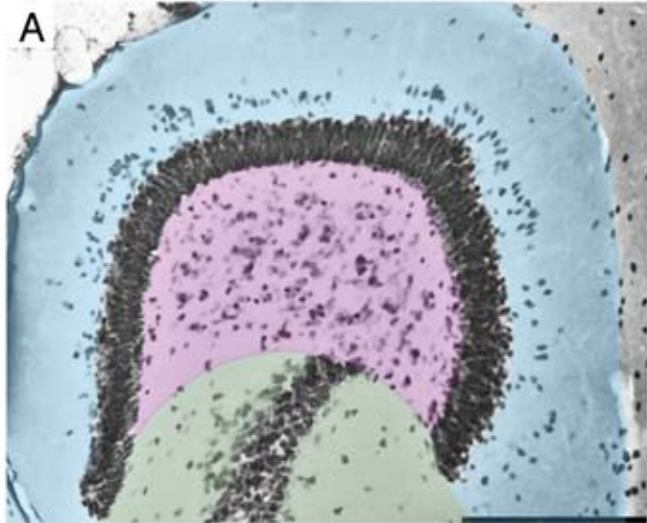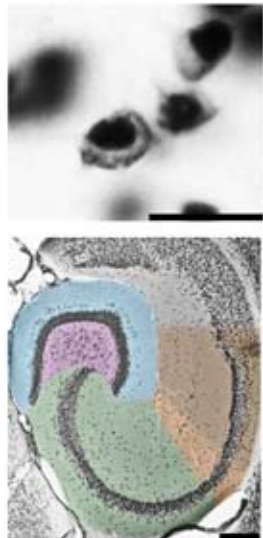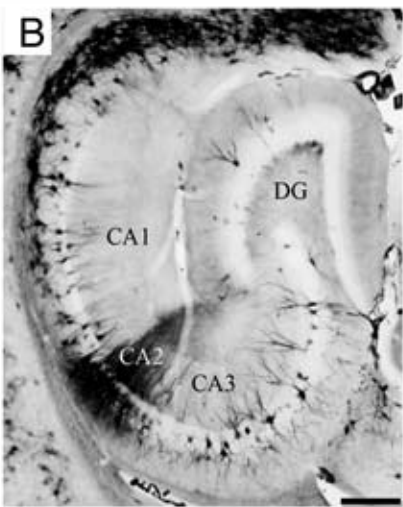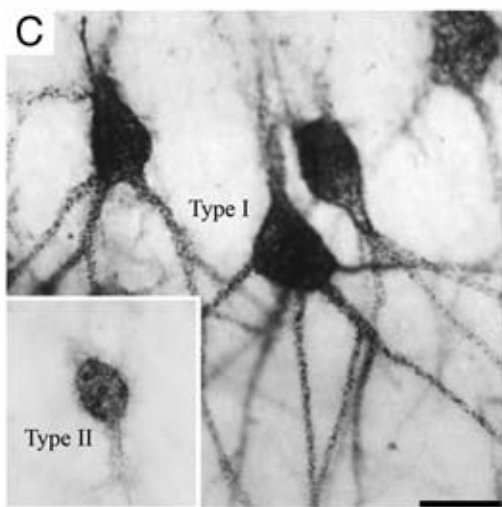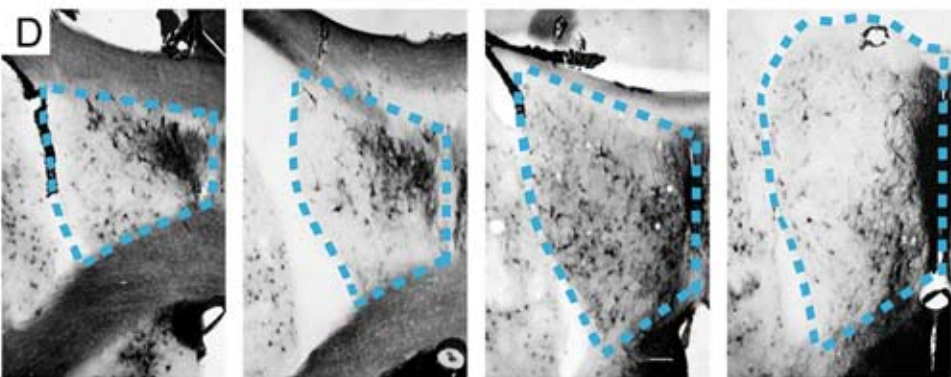

Supplement: prion0503_0215SD1.pdf [file prion0503_0215SD1.pdf]
